# Supplementary material
Source: Springer Nature journal article supplement (https://www.springermedizin.de/resource/supplementary/12888_2011_1066_MOESM3_ESM.pdf/9479652)

■ Mean "Healthy" families ■ Mean "At risk for psychiatric disorder" families

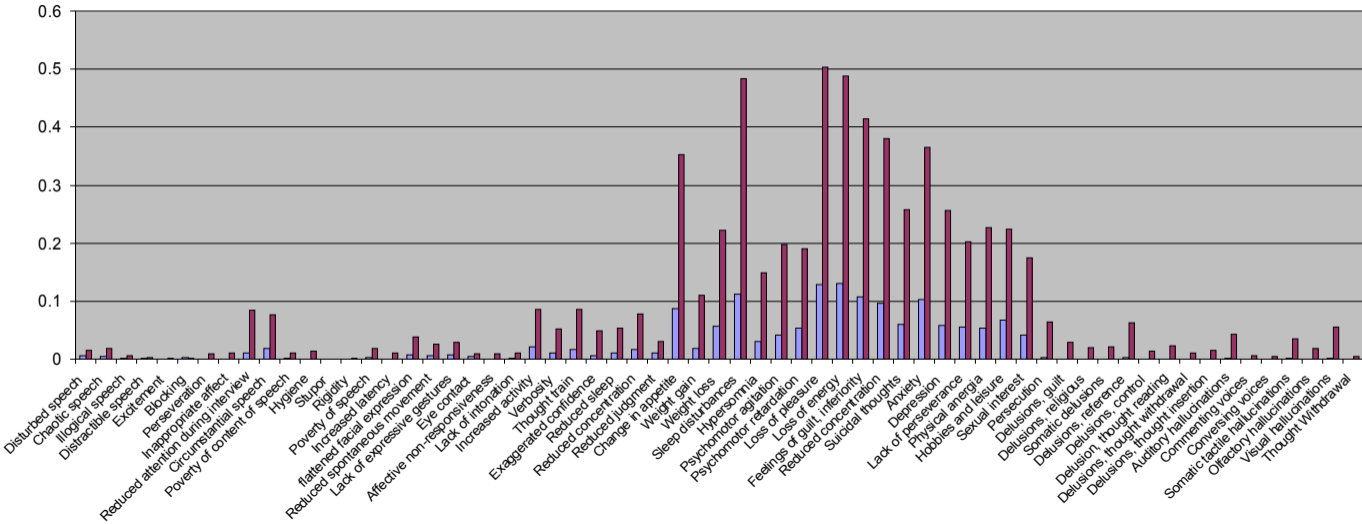

Supplement: MOESM3 [file 9479652]
